# Supplementary material for: The efficacy of alcelaphine herpesvirus-1 (AlHV-1) immunization with the adjuvants Emulsigen® and the monomeric TLR5 ligand FliC in zebu cattle against AlHV-1 malignant catarrhal fever induced by experimental virus challenge
Source: PubMed Central journal article supplement (PMC5081063; doi:10.1016/j.vetmic.2016.09.019), 2016-11-15
Supplement: mmc1.pdf [file mmc1.pdf]

## Supporting information 1:

| Group /<br>vaccination       | Cattle<br>ID | Day zero<br>Baseline | Day 105 | Day 133 | Day 163 | Terminal<br>sample (days) |
|------------------------------|--------------|----------------------|---------|---------|---------|---------------------------|
| 1:<br>atAIHV-1<br>+Emulsigen | 903          | Neg                  | Neg     | Neg     | Neg     | Sur                       |
|                              | 912          | Neg                  | Neg     | Neg     | Neg     | Sur                       |
|                              | 913          | Neg                  | Neg     | Neg     | Neg     | Sur                       |
|                              | 918          | Neg                  | Neg     | Neg     | Neg     | Sur                       |
|                              | 923          | Neg                  |         |         |         | Pos (99)                  |
|                              | 927          | Neg                  | Neg     | Neg     | Neg     | Sur                       |
|                              | 928          | Pos                  | Neg     | Neg     | Neg     | Sur                       |
|                              | 930          | Neg                  | Neg     |         |         | Pos (115)                 |
| 2:<br>atAIHV-1+FliC          | 906          | Neg                  | Neg     | Neg     | Neg     | Sur                       |
|                              | 908          | Neg                  | Pos     |         |         | Pos (112)                 |
|                              | 915          | Neg                  | Neg     | Neg     | Neg     | Sur                       |
|                              | 925          | Neg                  | Neg     | Neg     | Pos     | Pos (143)                 |
|                              | 929          | Neg                  | Pos     |         |         | Pos (115)                 |
|                              | 936          | Pos                  | Neg     |         |         | Pos (133)                 |
|                              | 938          | Neg                  | Neg     | Neg     | Neg     | Sur                       |
|                              | 940          | Neg                  | Neg     | Neg     | Neg     | Sur                       |
| 3:<br>atAIHV-1<br>+Em+FliC   | 905          | Neg                  | Pos     |         |         | Pos (108)                 |
|                              | 907          | Neg                  | Neg     | Neg     | Pos     | Pos (146)                 |
|                              | 910          | Neg                  | Neg     | Neg     | Neg     | Sur                       |
|                              | 916          | Neg                  | Pos     |         |         | Pos (127)                 |
|                              | 920          | Neg                  | Pos     |         |         | Pos (115)                 |
|                              | 922          | Neg                  | Pos     |         |         | Pos (115)                 |
|                              | 924          | Neg                  | Neg     | Neg     | Pos     | Pos (165)                 |
|                              | 935          | Neg                  | Neg     | Neg     | Neg     | Sur                       |
| 4:<br>Em only control        | 904          | Neg                  | Neg     | Pos     |         | Pos (136)                 |
|                              | 909          | Neg                  | Neg     | Neg     | Neg     | Sur                       |
|                              | 914          | Pos                  | Pos     | Pos     | Neg     | Sur                       |
|                              | 917          | Neg                  | Pos     |         |         | Pos (115)                 |
|                              | 926          | Neg                  | Neg     | Neg     | Neg     | Sur                       |
|                              | 931          | Neg                  | Pos     |         |         | Pos (112)                 |
|                              | 933          | Neg                  | Pos     |         |         | Pos (112)                 |
|                              | 937          | Pos                  | Neg     | Neg     | Neg     | Sur                       |
| 5:<br>FliC only<br>control   | 901          | Neg                  | Pos     |         |         | Pos (105)                 |
|                              | 902          | Neg                  |         |         |         | Pos (99)                  |
|                              | 911          | Neg                  | Pos     |         |         | Pos (108)                 |
|                              | 919          | Neg                  | Neg     | Neg     | Neg     | Sur                       |
|                              | 921          | Neg                  |         |         |         | Neg (103)                 |
|                              | 932          | Neg                  | Pos     |         |         | Pos (112)                 |
|                              | 934          | Neg                  | Pos     |         |         | Pos (115)                 |
|                              | 939          | Neg                  | Pos     |         |         | Pos (115)                 |

Samples collected at the start of the trial (baseline day zero) and at three time points thereafter are shown. The number of days to death and the result of the PCR assay performed on blood samples collected at this time ('Terminal sample') are shown in the far right hand column (Sur = animal survived, Pos = Positive, Neg = Negative).
